# Supplementary material
Source: PubMed Central journal article supplement (PMC7425118)
Supplement: NIHMS1609595-supplement-Supplemental_File_3.pdf [file NIHMS1609595-supplement-Supplemental_File_3.pdf]



# Genomic Counseling Guide

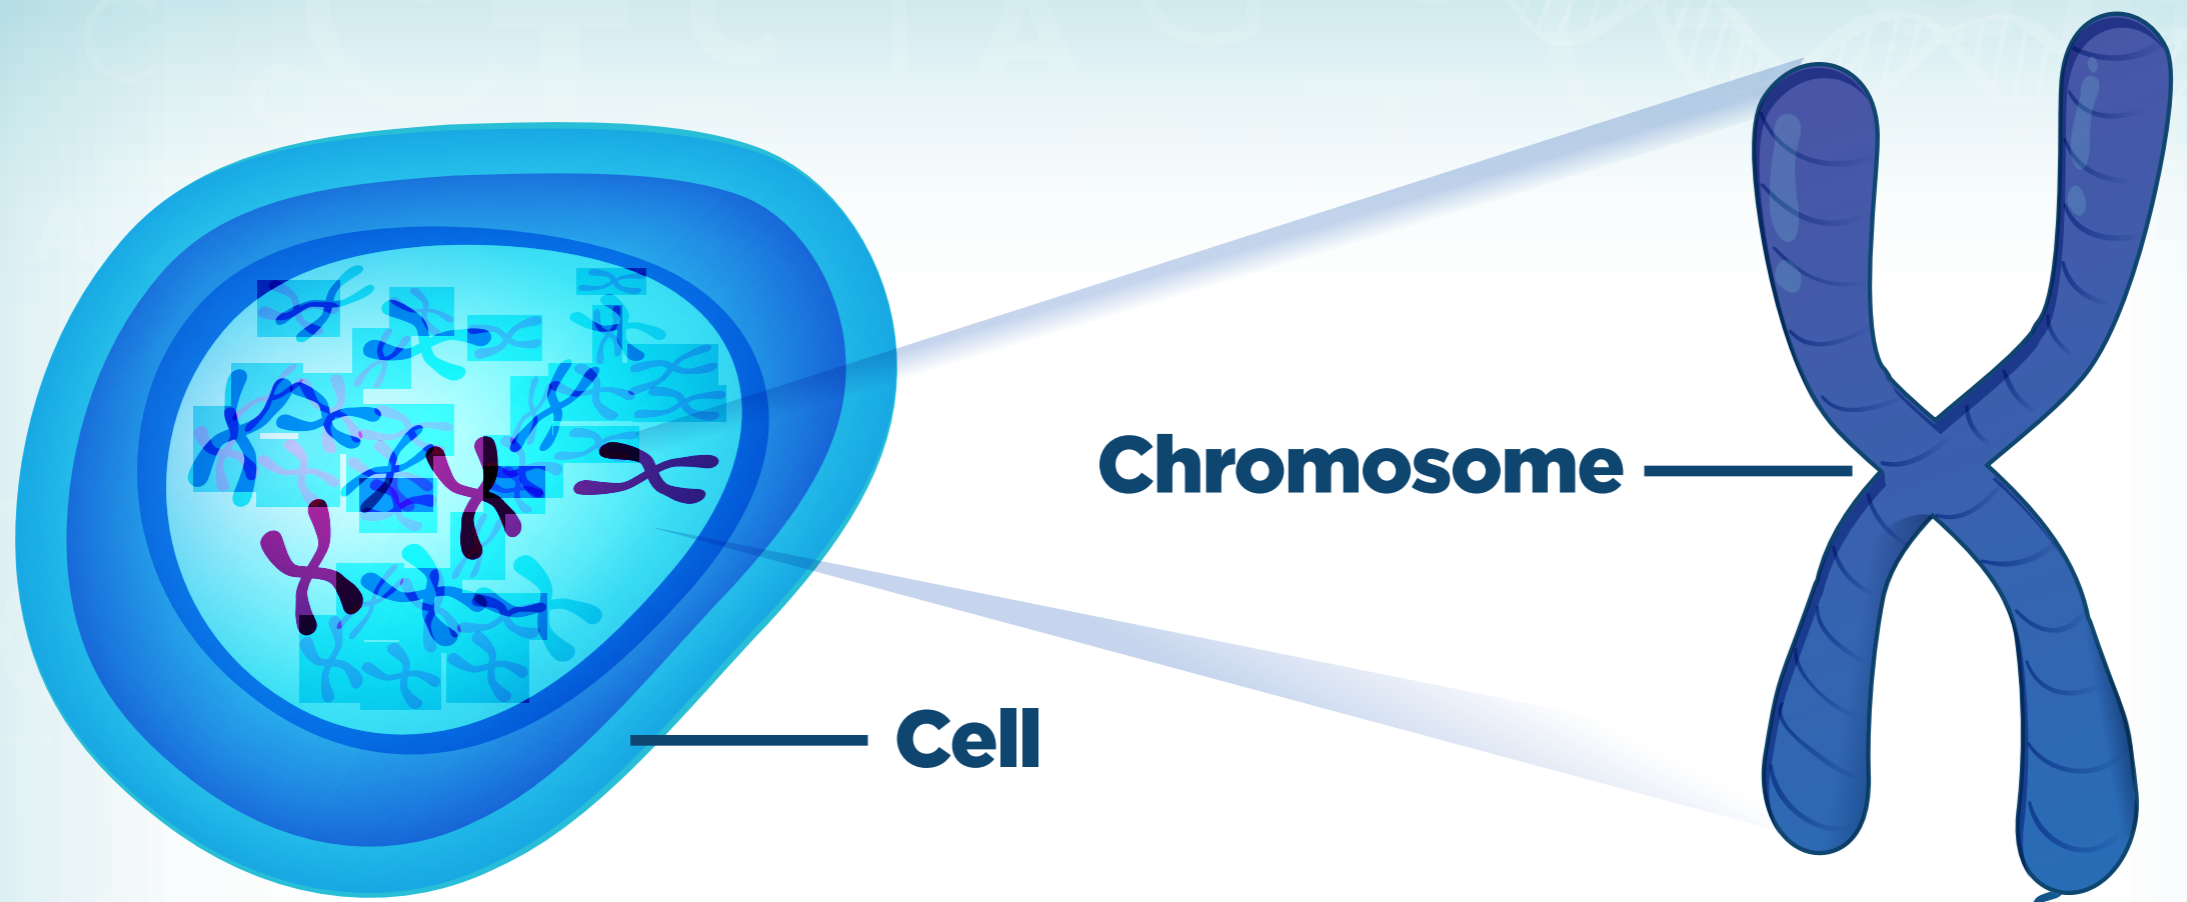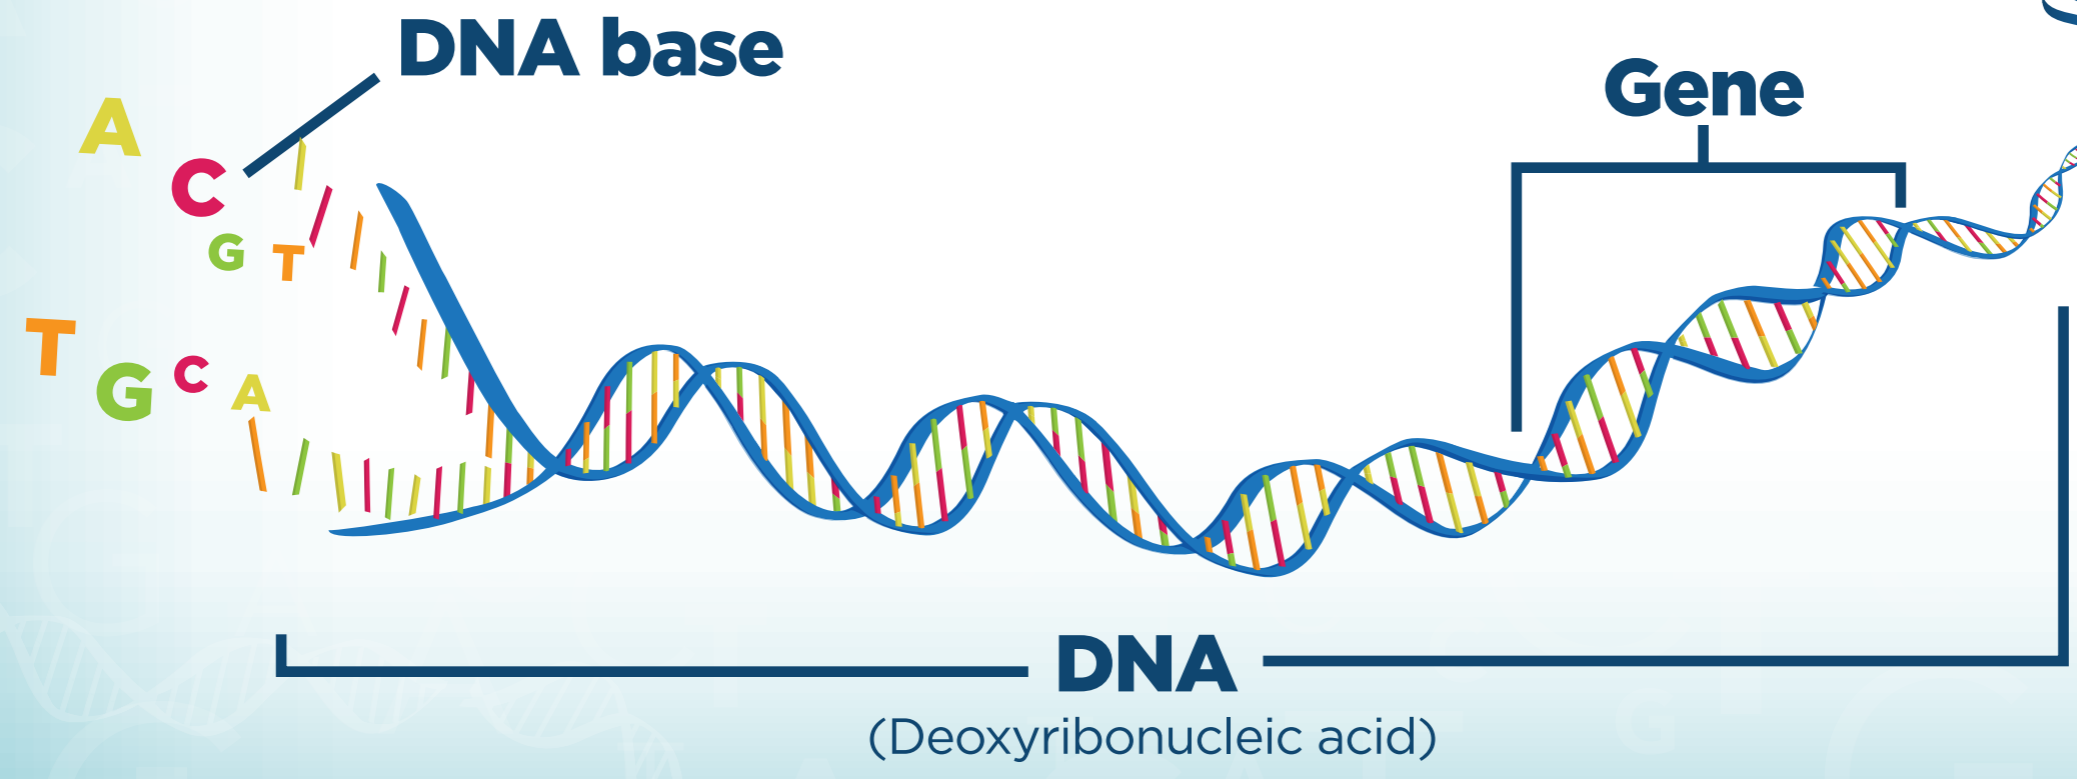

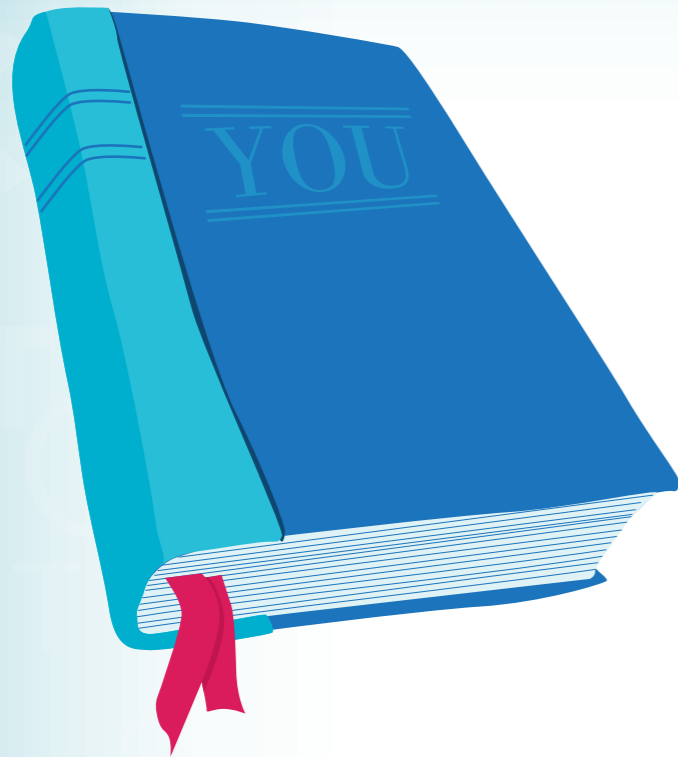

**BOOK – GENOME**

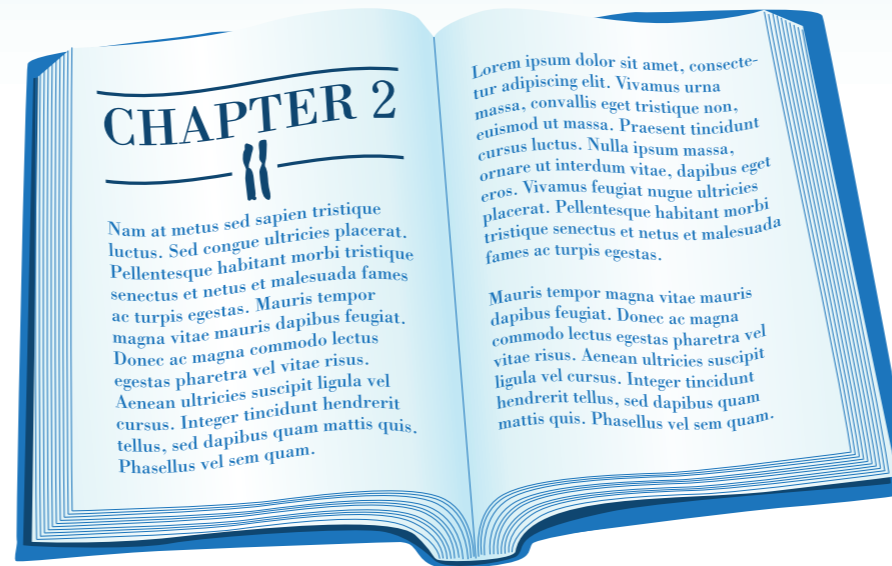

**CHAPTERS – CHROMOSOMES**

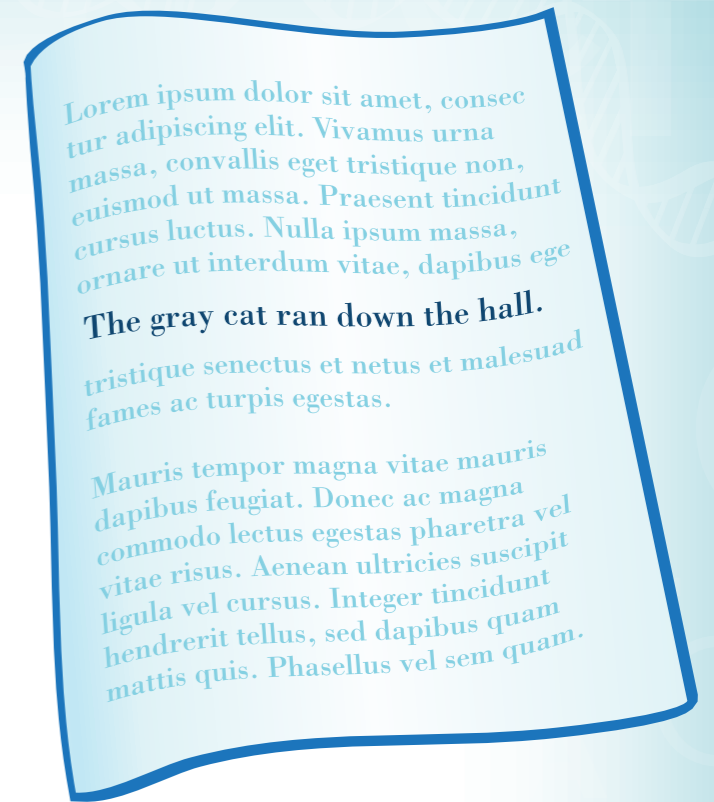

**SENTENCE – GENE**

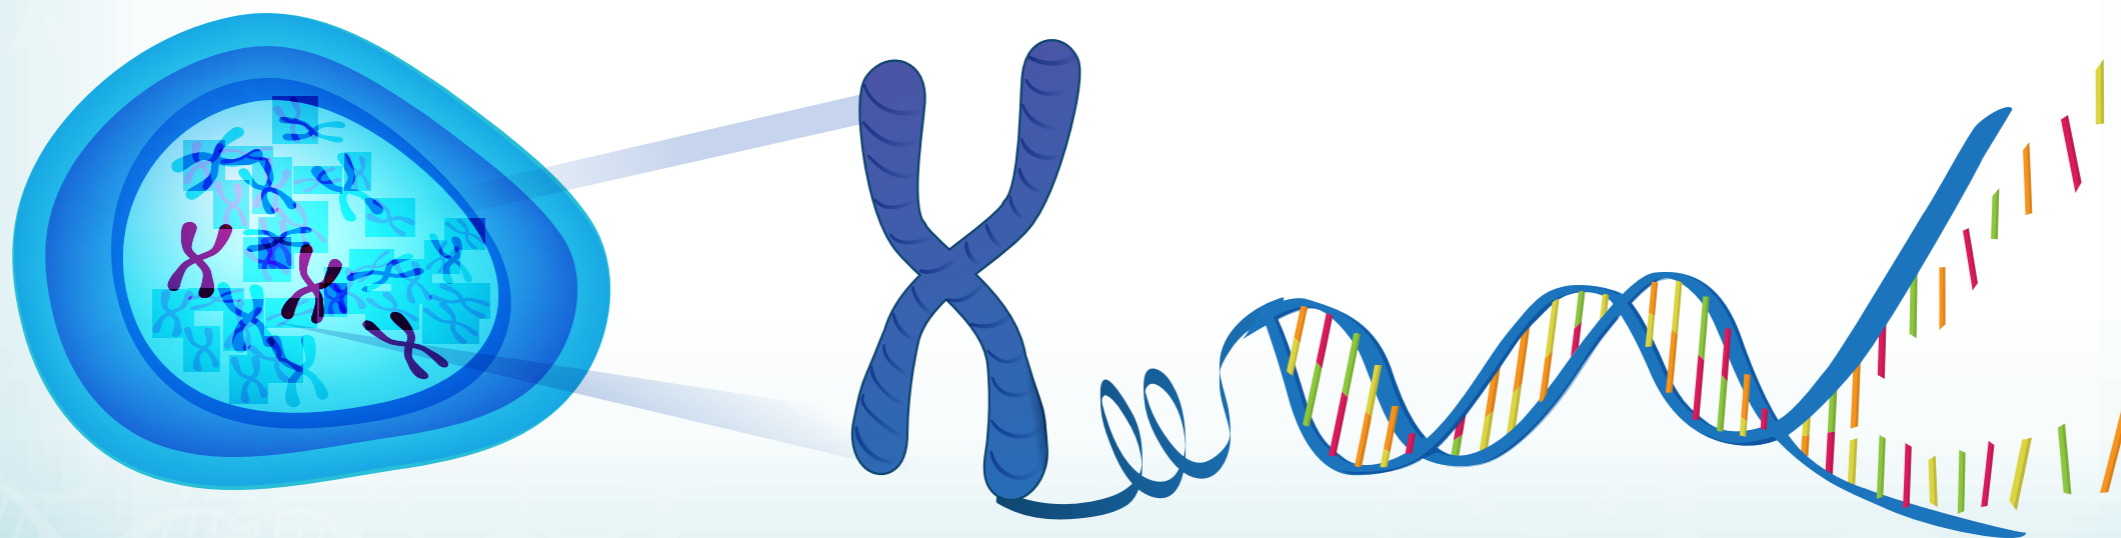

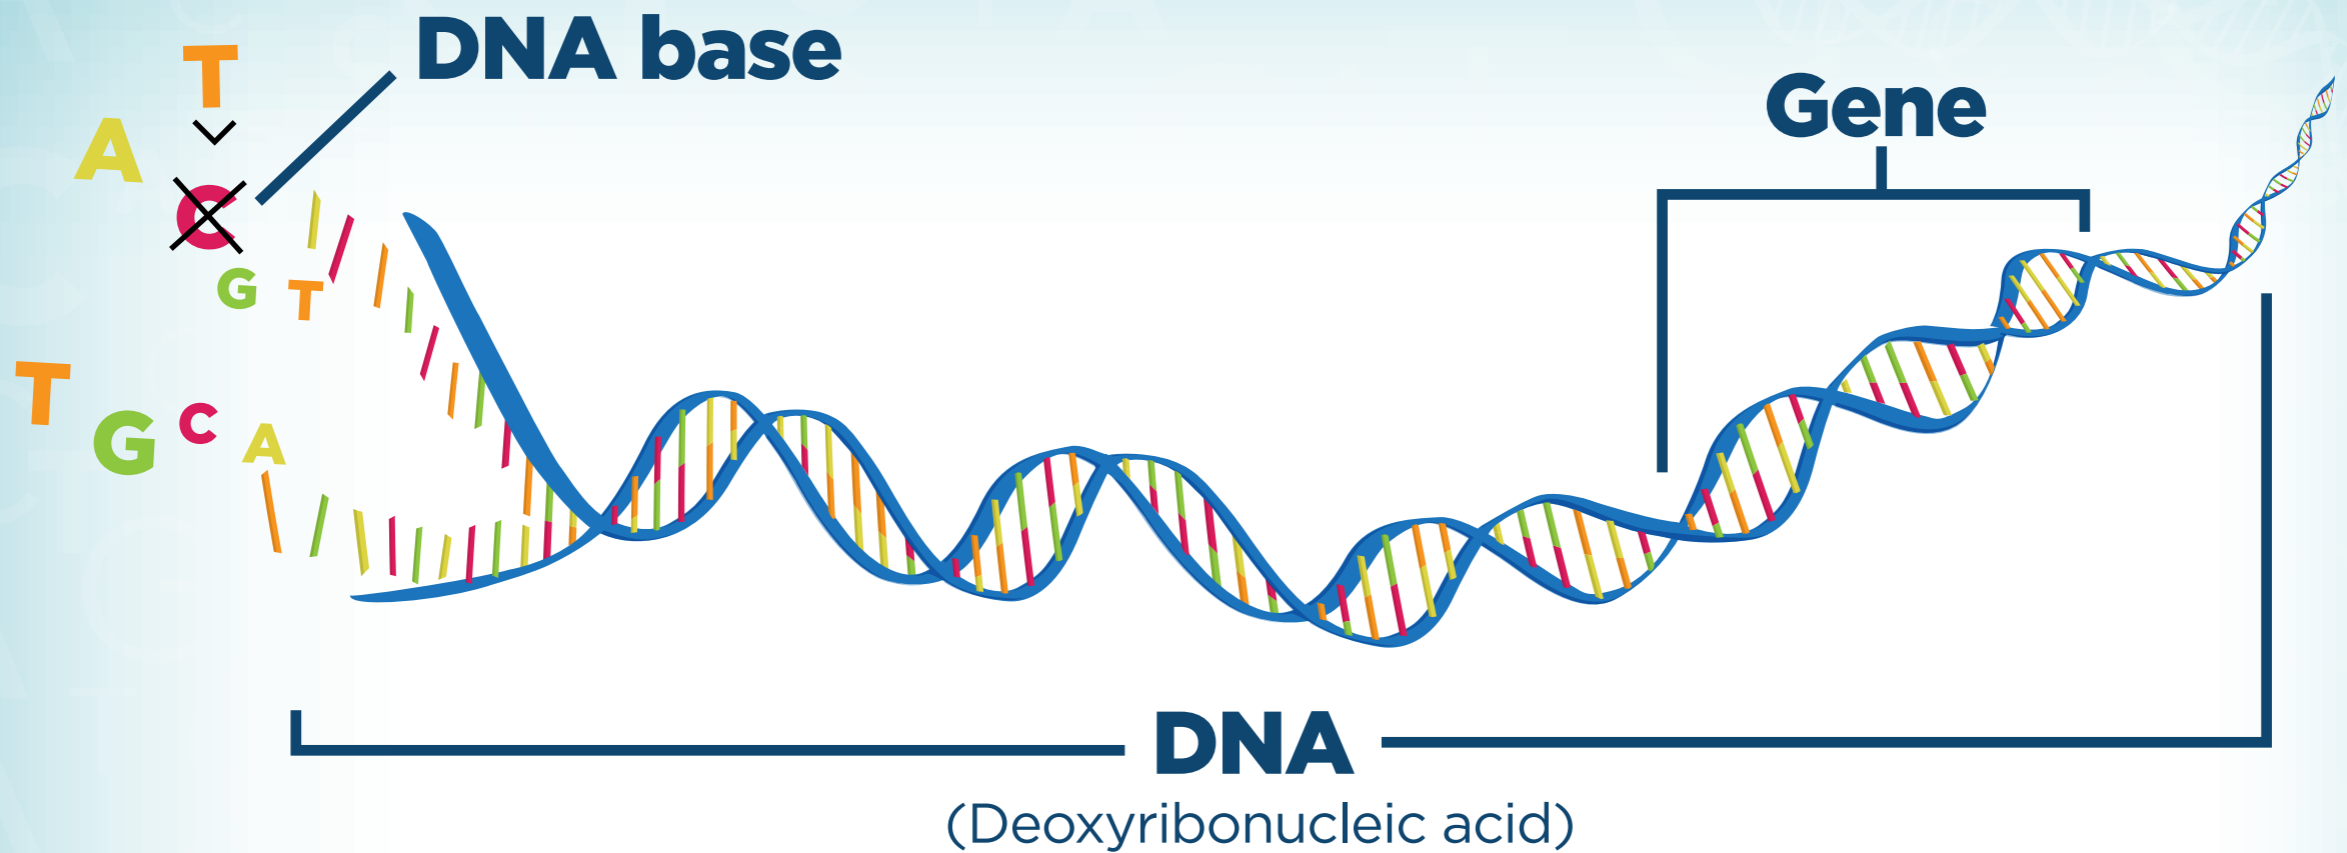

**The gray cat ran down the hall.**  
The gray cat ran down the **b**all.

**Changes in DNA might change the way a gene works.**

# Genomic testing to find cause of rare disease

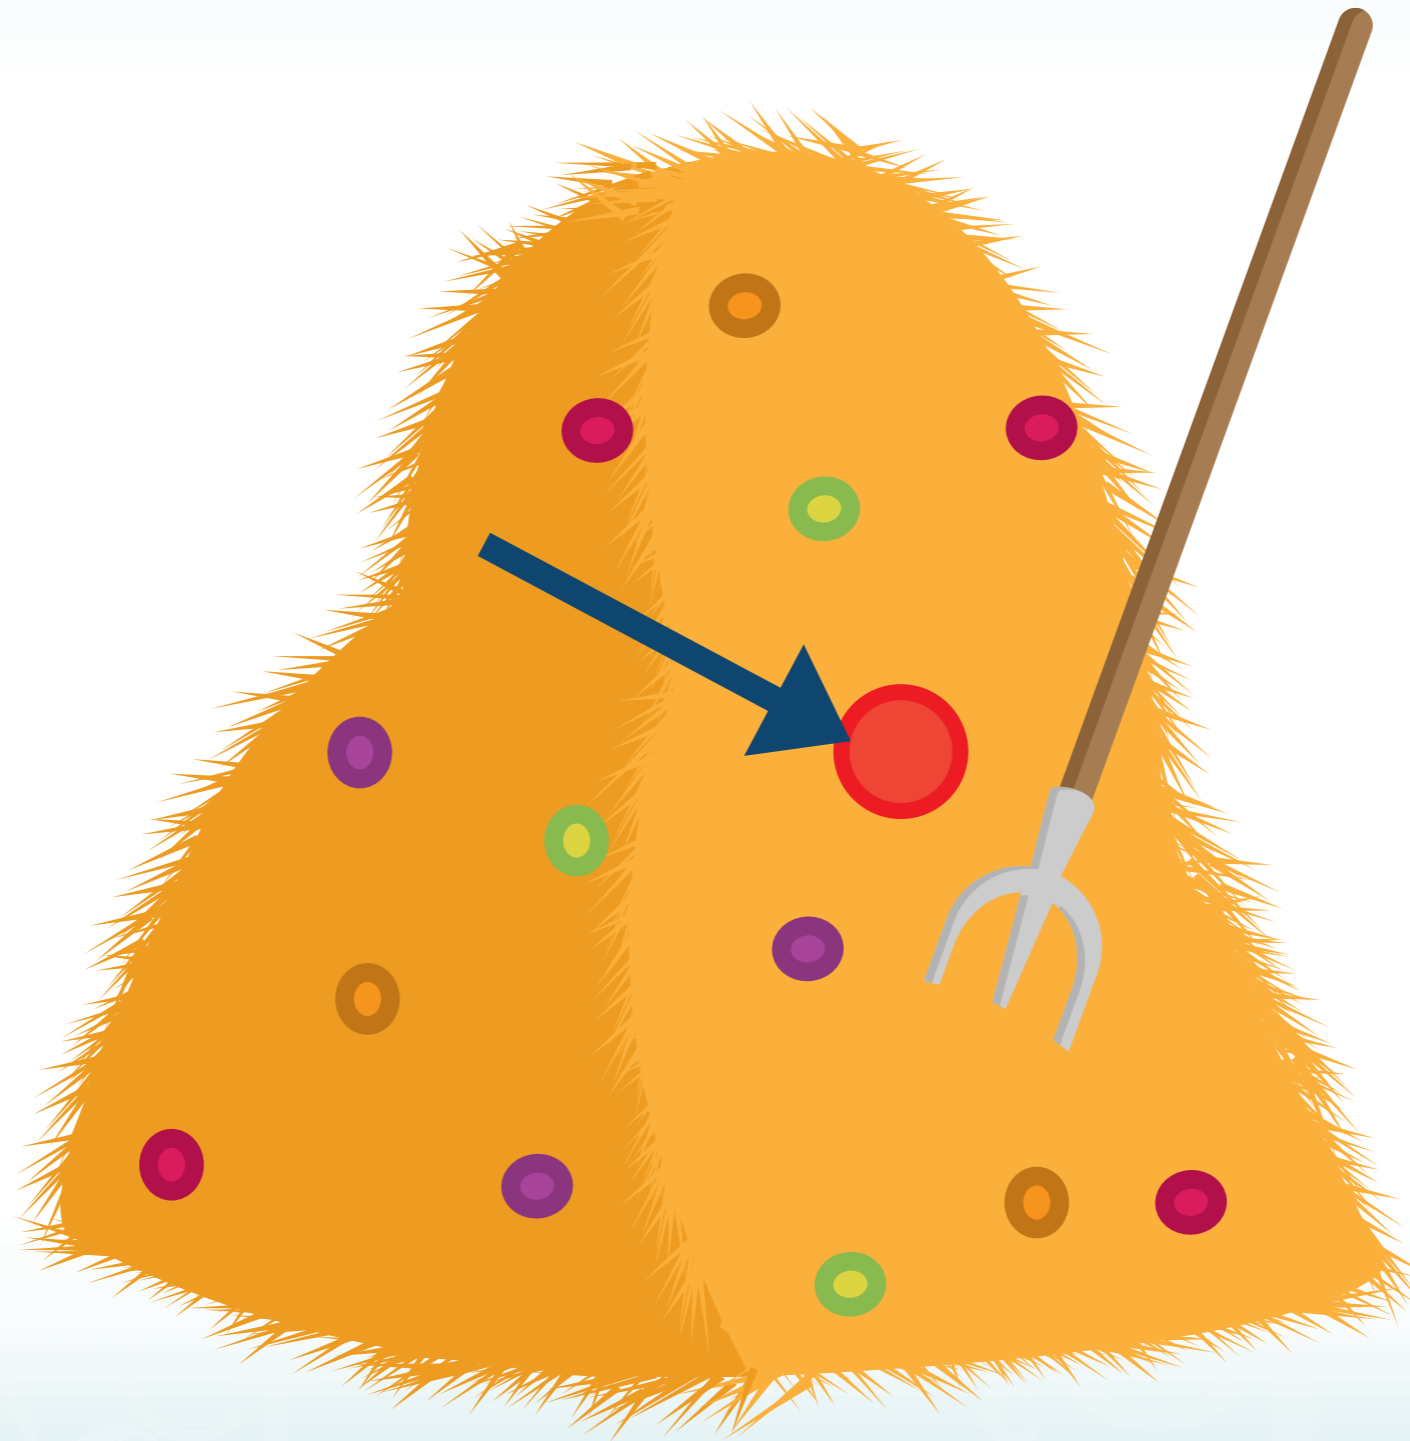

# Components of multifactorial disease

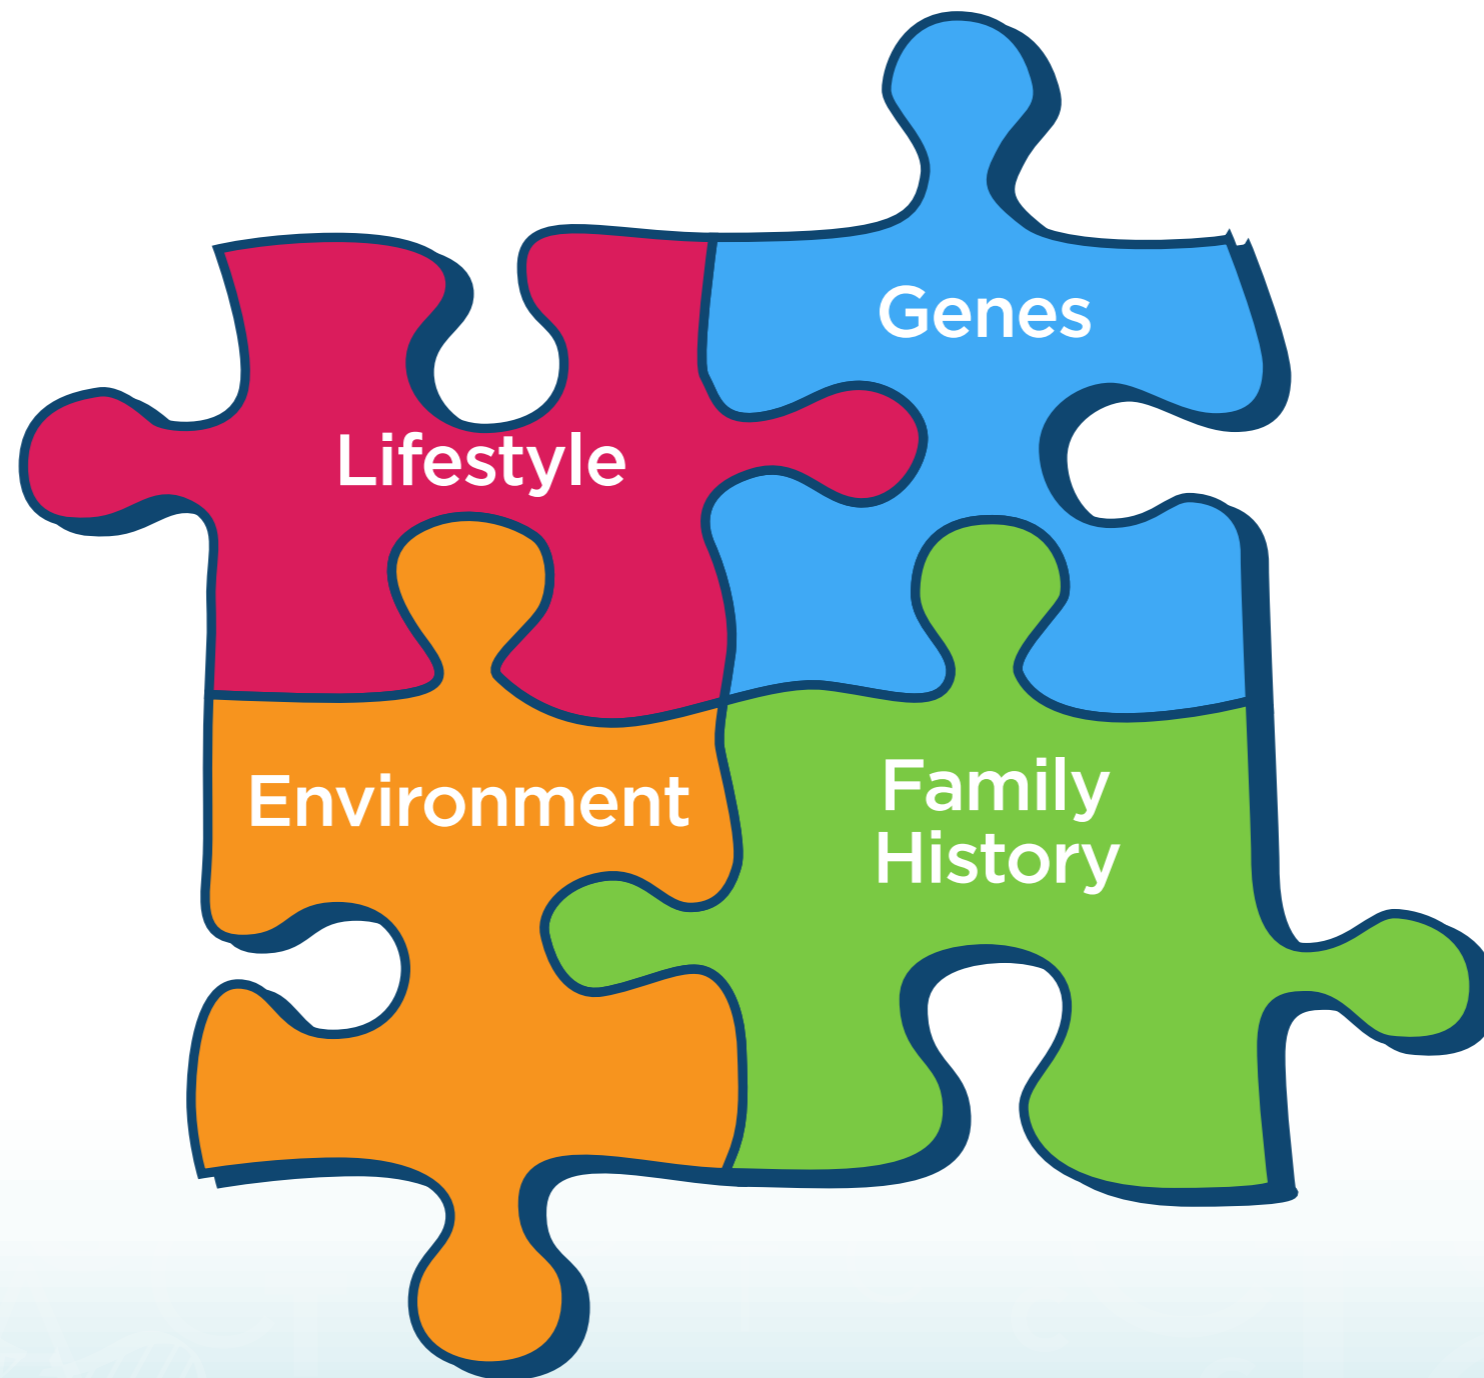

# Categories

| CATEGORY NUMBER                                                               | 1                                                                                              | 2                                                                                              | 3                                                                                              | 4                                                                                              | 5                                                                                              |
|-------------------------------------------------------------------------------|------------------------------------------------------------------------------------------------|------------------------------------------------------------------------------------------------|------------------------------------------------------------------------------------------------|------------------------------------------------------------------------------------------------|------------------------------------------------------------------------------------------------|
| WHAT <b>TYPE OF RESULTS</b> CAN I LEARN FROM THIS CATEGORY?                   | You have a high risk for diseases or drug side effects                                         | You have a slightly higher/ lower risk for common diseases                                     | You already have diseases, or have a higher risk for some                                      | You have a high risk for brain diseases at a young age                                         | You are a carrier for diseases                                                                 |
| ARE <b>DISEASES</b> IN THIS CATEGORY <b>TREATABLE</b> or <b>PREVENTABLE</b> ? | Yes, specific medical interventions <b>are</b> available                                       | No, specific medical interventions are <b>not</b> available for diseases in these categories   |                                                                                                |                                                                                                | Medical interventions are available for <b>some diseases</b>                                   |
| WHAT ARE SOME <b>EXAMPLES OF DISEASES</b> IN THIS CATEGORY?                   | Breast & ovarian cancer, aortic aneurysm, long QT syndrome & more                              | Coronary artery disease, type 2 diabetes & more                                                | Birth defects (in kidneys, bones), Degenerative diseases (nerve damage, blindness) & more      | Early-onset Alzheimer's, early-onset Parkinson's, late-onset Krabbe disease                    | Carrier for cystic fibrosis, sickle cell disease, phenylketonuria & more                       |
| DO YOU WANT TO KNOW THIS CATEGORY OF RESULTS?                                 | Yes <input type="checkbox"/><br>No <input type="checkbox"/><br>Unsure <input type="checkbox"/> |

**This project was made possible through  
the National Society of Genetic Counselors  
and a grant from the Audrey Heimler  
Special Project Award.**

**Thank you to the following contributors:**

**Kiley Johnson  
Shannon Kieran  
Sara Riordan  
Bryan Dunn  
Kelly Nixon**

**Thank you to the many others  
who made this project a success.**
