# Supplementary material
Source: PubMed Central journal article supplement (PMC7425118)

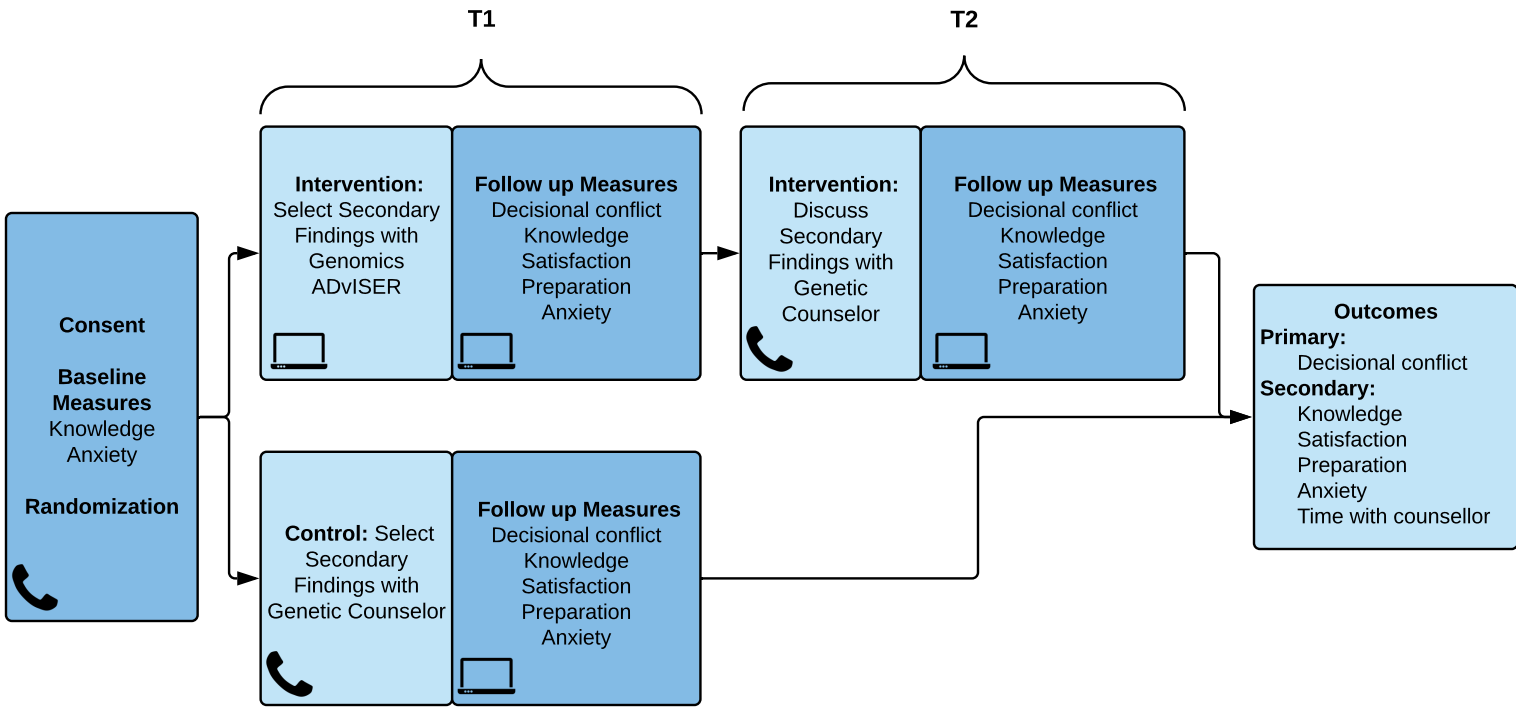

Supplement: NIHMS1609595-supplement-Supplemental_File_1.pdf [file NIHMS1609595-supplement-Supplemental_File_1.pdf]
